# Supplementary material for: The Utilization of the SaLux19-Based Loop-Mediated Isothermal Amplification (LAMP) Assay for the Rapid and Sensitive Identification of Minute Amounts of a Biological Specimen
Source: MDPI journal article supplement (doi:10.3390/life14050579), 2024-04-30
Supplement: s1 [file s1]

# SUPPLEMENTARY FIGURES

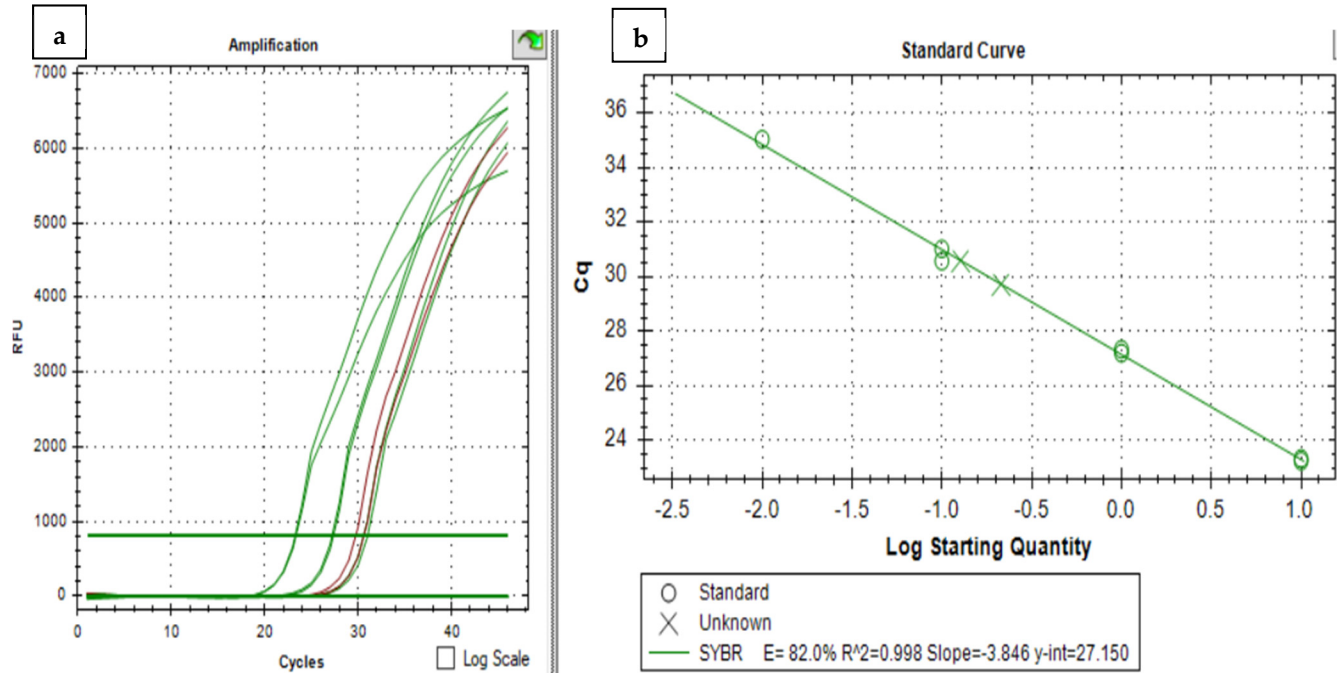

**Supplementary Figure S1.** Examined sample of *Sus scrofa* DNA (100xdiluted-brown color) shown in (a); Calibration curve—amplified TBP (TATA binding protein) gene target, male Human DNA Standard (green—10 ng/μL, 1 ng/μL, 100 pg/μL) shown in (b).

## SUPPLEMENTARY FIGURES

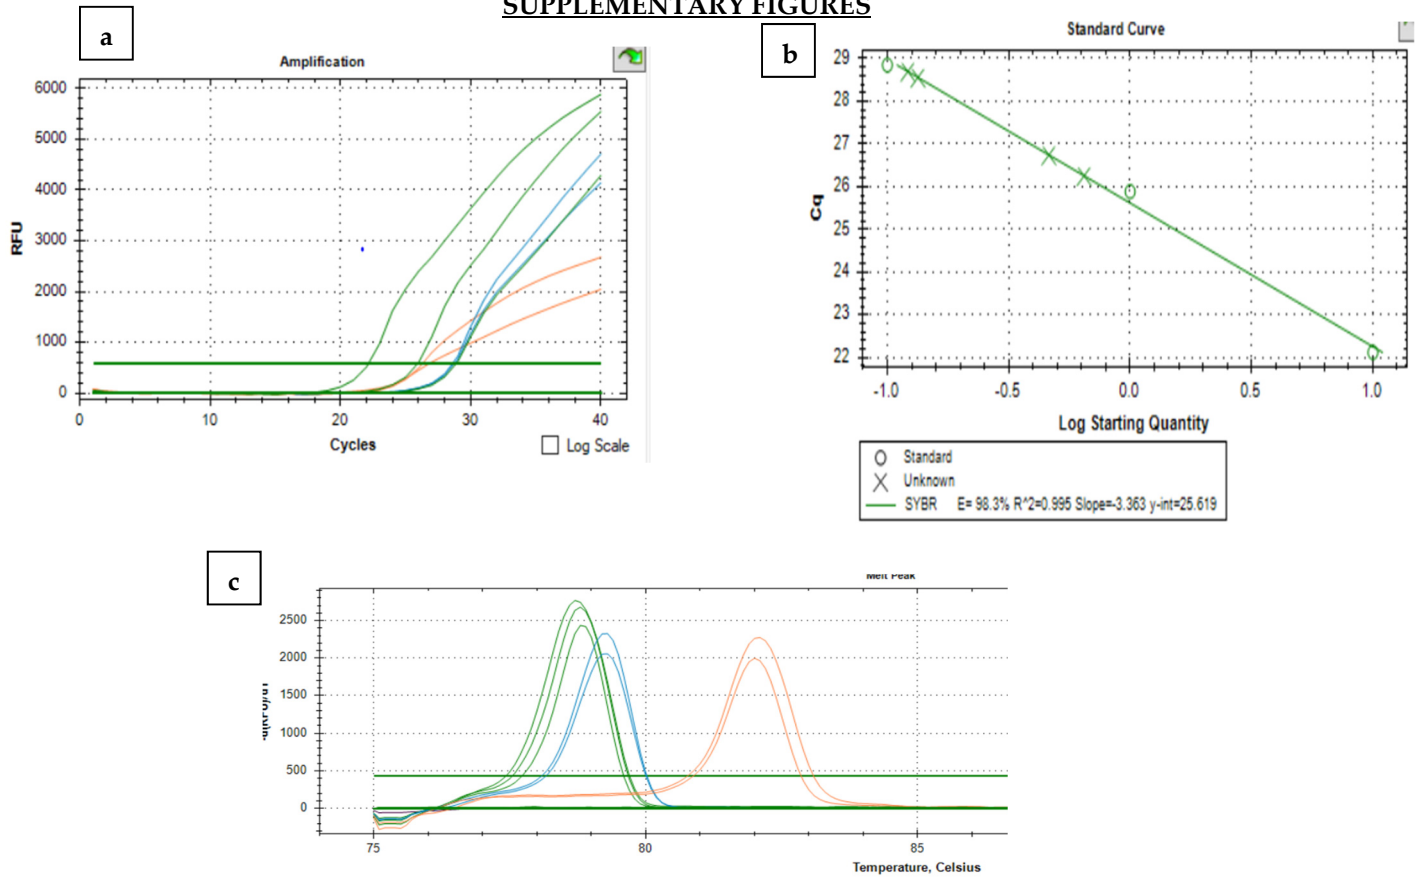

**Supplementary Figure S2.** (a) Amplification of 16S gene (orange), TBP gene (blue) of *Sus scrofa* sample (100× diluted) allowing relative quantification in the same run as its absolute quantification. (b) Calibration curve generated with the male human DNA control (ThermoFisher, green—10 ng/μL, 1 ng/μL, 100 pg/μL) and TBP primers. (c) High resolution melting profiles of 16S gene, TBP (TATA binding protein) gene and the male human DNA control.

# SUPPLEMENTARY FIGURES

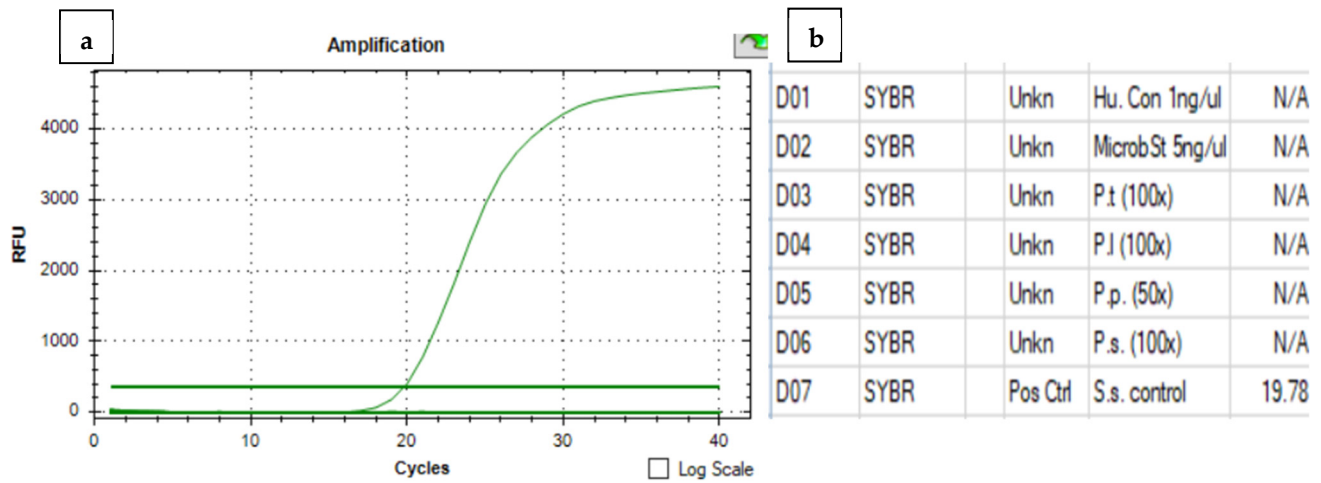

**Supplementary Figure S3.** The test of LAMP assay specificity; (a) Amplification of positive control *Sus scrofa* DNA; (b) A qPCR plate sheet containing names and Ct values of various samples when amplified with same primers.
